# Supplementary material for: Microbial Community Analysis of a Coastal Salt Marsh Affected by the Deepwater Horizon Oil Spill
Source: PubMed Central journal article supplement (PMC3399869; doi:10.1371/journal.pone.0041305), 2012-07-18
Supplement: pone.0041305.s001.pdf [file pone.0041305.s001.pdf]

**Table S1.** Total number of bacterial OTUs detected by PhyloChip in Inlet and Marsh sediments in all phyla.

| Phylum                  | Inlet 0-2 cm |      |      | Inlet 8-10 cm |      |      | Marsh 0-2 cm |      |      | Marsh 8-10 cm |      |      |
|-------------------------|--------------|------|------|---------------|------|------|--------------|------|------|---------------|------|------|
|                         | June         | July | Sept | June          | July | Sept | June         | July | Sept | June          | July | Sept |
| ABY1_OD1                | 2            | 4    | 5    | 3             | 3    | 4    | 0            | 5    | 3    | 2             | 6    | 4    |
| AC1                     | 0            | 1    | 1    | 0             | 0    | 1    | 0            | 1    | 1    | 0             | 1    | 1    |
| <i>Acidobacteria</i>    | 60           | 201  | 161  | 88            | 98   | 105  | 60           | 183  | 68   | 81            | 173  | 114  |
| <i>Actinobacteria</i>   | 231          | 734  | 603  | 284           | 329  | 410  | 229          | 770  | 452  | 265           | 657  | 444  |
| AD3                     | 0            | 3    | 3    | 0             | 0    | 3    | 2            | 3    | 3    | 1             | 4    | 1    |
| <i>Aquificae</i>        | 5            | 8    | 10   | 9             | 9    | 8    | 4            | 6    | 7    | 4             | 8    | 8    |
| <i>Armatimonadetes</i>  | 1            | 13   | 8    | 2             | 2    | 6    | 2            | 11   | 3    | 1             | 15   | 5    |
| <i>Bacteroidetes</i>    | 185          | 488  | 555  | 179           | 204  | 134  | 139          | 689  | 75   | 158           | 445  | 154  |
| BH1                     | 1            | 1    | 1    | 0             | 1    | 1    | 0            | 1    | 1    | 0             | 1    | 1    |
| BRC1                    | 0            | 4    | 3    | 1             | 2    | 2    | 1            | 3    | 1    | 3             | 4    | 3    |
| <i>Caldiserica</i>      | 0            | 0    | 0    | 0             | 0    | 0    | 0            | 1    | 0    | 0             | 1    | 0    |
| CCM11b                  | 1            | 1    | 1    | 1             | 1    | 1    | 0            | 1    | 0    | 1             | 1    | 1    |
| CD12                    | 1            | 1    | 1    | 1             | 1    | 1    | 1            | 1    | 1    | 1             | 1    | 1    |
| <i>Chlamydiae</i>       | 1            | 0    | 1    | 1             | 1    | 0    | 1            | 1    | 0    | 1             | 1    | 0    |
| <i>Chlorobi</i>         | 5            | 15   | 17   | 11            | 12   | 12   | 3            | 17   | 9    | 8             | 19   | 12   |
| <i>Chloroflexi</i>      | 46           | 139  | 99   | 68            | 71   | 79   | 61           | 158  | 73   | 73            | 169  | 100  |
| <i>Chrysiogenetes</i>   | 0            | 1    | 0    | 0             | 0    | 0    | 0            | 1    | 1    | 0             | 1    | 0    |
| <i>Cyanobacteria</i>    | 51           | 158  | 122  | 70            | 75   | 52   | 47           | 154  | 36   | 39            | 130  | 76   |
| <i>Deferribacteres</i>  | 1            | 2    | 2    | 1             | 1    | 1    | 1            | 2    | 1    | 1             | 4    | 3    |
| <i>Dictyoglomi</i>      | 1            | 2    | 1    | 1             | 1    | 1    | 0            | 2    | 1    | 1             | 2    | 1    |
| <i>Elusimicrobia</i>    | 0            | 9    | 7    | 1             | 1    | 3    | 0            | 6    | 2    | 0             | 8    | 3    |
| EM3                     | 0            | 1    | 0    | 0             | 0    | 0    | 0            | 1    | 0    | 0             | 1    | 0    |
| <i>Fibrobacteres</i>    | 1            | 8    | 8    | 2             | 1    | 3    | 1            | 9    | 2    | 1             | 6    | 3    |
| <i>Firmicutes</i>       | 150          | 830  | 1262 | 276           | 312  | 975  | 117          | 1050 | 1560 | 157           | 1013 | 787  |
| <i>Bacilli</i>          | 52           | 246  | 514  | 88            | 118  | 461  | 50           | 298  | 714  | 51            | 299  | 330  |
| <i>Clostridia</i>       | 98           | 584  | 748  | 188           | 194  | 514  | 67           | 752  | 846  | 106           | 714  | 457  |
| <i>Fusobacteria</i>     | 10           | 27   | 16   | 14            | 8    | 5    | 13           | 32   | 2    | 2             | 29   | 3    |
| GAL15                   | 1            | 1    | 2    | 1             | 1    | 1    | 0            | 1    | 1    | 1             | 1    | 2    |
| <i>Gemmatimonadetes</i> | 26           | 66   | 62   | 33            | 38   | 37   | 15           | 58   | 29   | 29            | 63   | 45   |
| GN02                    | 0            | 0    | 0    | 0             | 0    | 0    | 0            | 0    | 0    | 0             | 0    | 0    |
| GN04                    | 1            | 6    | 5    | 3             | 6    | 5    | 1            | 7    | 3    | 3             | 8    | 5    |
| GN06                    | 1            | 4    | 1    | 2             | 2    | 2    | 2            | 4    | 1    | 2             | 4    | 2    |
| GN1                     | 0            | 0    | 0    | 0             | 0    | 0    | 0            | 0    | 0    | 0             | 0    | 0    |
| GN12                    | 0            | 1    | 1    | 0             | 0    | 1    | 0            | 1    | 0    | 0             | 1    | 1    |
| GOUTA4                  | 0            | 0    | 0    | 0             | 0    | 0    | 0            | 0    | 0    | 0             | 0    | 0    |
| HDBW-WB69               | 0            | 1    | 1    | 0             | 1    | 1    | 0            | 1    | 1    | 0             | 1    | 1    |
| Hyd24-12                | 0            | 1    | 1    | 0             | 1    | 1    | 0            | 1    | 1    | 0             | 2    | 1    |
| KSB1                    | 2            | 3    | 2    | 4             | 2    | 2    | 0            | 3    | 2    | 3             | 2    | 2    |
| LCP-89                  | 0            | 5    | 5    | 4             | 4    | 4    | 1            | 2    | 1    | 5             | 4    | 5    |
| LD1                     | 1            | 2    | 0    | 1             | 1    | 0    | 1            | 2    | 1    | 1             | 2    | 0    |
| <i>Lentisphaerae</i>    | 6            | 13   | 9    | 8             | 8    | 8    | 7            | 11   | 5    | 7             | 13   | 9    |
| MD2896-B26              | 0            | 1    | 1    | 1             | 1    | 1    | 0            | 1    | 1    | 1             | 1    | 1    |
| MSBL6                   | 2            | 2    | 3    | 3             | 3    | 3    | 2            | 2    | 1    | 3             | 3    | 2    |
| MVP-15                  | 1            | 3    | 3    | 2             | 3    | 3    | 1            | 4    | 4    | 1             | 4    | 3    |
| NC10                    | 4            | 9    | 4    | 6             | 6    | 5    | 4            | 9    | 5    | 4             | 7    | 7    |
| <i>Nitrospirae</i>      | 5            | 18   | 14   | 11            | 9    | 9    | 4            | 20   | 3    | 5             | 19   | 12   |
| NKB19                   | 2            | 10   | 9    | 6             | 7    | 5    | 2            | 11   | 3    | 5             | 11   | 8    |

Table S1. (continued)

| Phylum                             | Inlet 0-2 cm |             |             | Inlet 8-10 cm |             |             | Marsh 0-2 cm |             |             | Marsh 8-10 cm |             |             |
|------------------------------------|--------------|-------------|-------------|---------------|-------------|-------------|--------------|-------------|-------------|---------------|-------------|-------------|
|                                    | June         | July        | Sept        | June          | July        | Sept        | June         | July        | Sept        | June          | July        | Sept        |
| OP1                                | 0            | 1           | 0           | 0             | 0           | 0           | 0            | 1           | 0           | 0             | 1           | 1           |
| OP11                               | 1            | 1           | 2           | 1             | 3           | 2           | 1            | 2           | 2           | 2             | 2           | 2           |
| OP3                                | 4            | 8           | 8           | 6             | 7           | 7           | 4            | 7           | 5           | 4             | 8           | 6           |
| OP8                                | 3            | 6           | 8           | 3             | 5           | 5           | 3            | 6           | 1           | 6             | 9           | 8           |
| OP9                                | 3            | 6           | 7           | 3             | 3           | 3           | 2            | 6           | 4           | 4             | 10          | 6           |
| PAUC34f                            | 1            | 3           | 2           | 1             | 1           | 1           | 1            | 2           | 1           | 1             | 2           | 1           |
| <i>Planctomycetes</i>              | 76           | 166         | 117         | 90            | 85          | 79          | 74           | 157         | 45          | 77            | 147         | 97          |
| <i>Proteobacteria</i>              | 1140         | 3196        | 3843        | 1441          | 1560        | 1719        | 713          | 3625        | 1019        | 1084          | 2439        | 1684        |
| <i>Alphaproteobacteria</i>         | 151          | 720         | 820         | 154           | 138         | 332         | 113          | 903         | 206         | 108           | 457         | 312         |
| <i>Betaproteobacteria</i>          | 145          | 411         | 487         | 161           | 182         | 278         | 109          | 452         | 249         | 124           | 320         | 261         |
| <i>Deltaproteobacteria</i>         | 164          | 560         | 438         | 244           | 270         | 278         | 159          | 595         | 172         | 209           | 567         | 318         |
| <i>Epsilonproteobacteria</i>       | 36           | 54          | 107         | 88            | 98          | 89          | 44           | 90          | 27          | 84            | 104         | 90          |
| <i>Gammaproteobacteria</i>         | 642          | 1446        | 1983        | 792           | 869         | 740         | 288          | 1577        | 364         | 558           | 986         | 699         |
| Unclassified <i>Proteobacteria</i> | 0            | 1           | 4           | 0             | 1           | 0           | 0            | 3           | 0           | 0             | 1           | 1           |
| <i>Zetaproteobacteria</i>          | 2            | 4           | 4           | 2             | 2           | 2           | 0            | 5           | 1           | 1             | 4           | 3           |
| SAR406                             | 4            | 26          | 20          | 12            | 13          | 17          | 5            | 25          | 15          | 10            | 24          | 19          |
| SBR1093                            | 0            | 1           | 4           | 1             | 0           | 1           | 1            | 4           | 1           | 2             | 4           | 1           |
| SC4                                | 2            | 3           | 3           | 2             | 2           | 3           | 0            | 3           | 2           | 2             | 3           | 3           |
| SM2F11                             | 0            | 0           | 0           | 0             | 0           | 0           | 0            | 0           | 0           | 0             | 0           | 0           |
| SPAM                               | 3            | 4           | 6           | 2             | 2           | 5           | 2            | 6           | 5           | 3             | 6           | 5           |
| <i>Spirochaetes</i>                | 16           | 67          | 64          | 31            | 36          | 44          | 19           | 65          | 35          | 20            | 73          | 43          |
| SR1                                | 2            | 4           | 3           | 3             | 4           | 4           | 2            | 4           | 4           | 2             | 4           | 4           |
| <i>Synergistetes</i>               | 3            | 10          | 11          | 4             | 6           | 6           | 3            | 11          | 6           | 2             | 11          | 7           |
| <i>Tenericutes</i>                 | 8            | 59          | 68          | 18            | 19          | 53          | 12           | 81          | 68          | 17            | 72          | 39          |
| TG3                                | 0            | 5           | 6           | 3             | 3           | 4           | 1            | 4           | 1           | 4             | 6           | 4           |
| <i>Thermi</i>                      | 3            | 10          | 9           | 4             | 4           | 8           | 4            | 8           | 9           | 4             | 10          | 11          |
| <i>Thermodesulfobacteria</i>       | 1            | 4           | 3           | 3             | 2           | 3           | 1            | 3           | 2           | 2             | 4           | 4           |
| <i>Thermotogae</i>                 | 0            | 1           | 2           | 1             | 0           | 0           | 0            | 4           | 0           | 0             | 3           | 2           |
| TK-SH1                             | 0            | 0           | 1           | 0             | 0           | 0           | 0            | 0           | 0           | 0             | 0           | 0           |
| TM6                                | 3            | 9           | 5           | 4             | 4           | 3           | 3            | 9           | 4           | 4             | 13          | 6           |
| TM7                                | 1            | 3           | 1           | 1             | 1           | 1           | 1            | 3           | 0           | 1             | 3           | 1           |
| Unclassified                       | 0            | 3           | 2           | 1             | 1           | 2           | 0            | 3           | 2           | 1             | 3           | 2           |
| <i>Verrucomicrobia</i>             | 36           | 142         | 99          | 35            | 37          | 37          | 34           | 138         | 22          | 26            | 90          | 41          |
| VHS-B3-43                          | 0            | 0           | 0           | 1             | 1           | 0           | 0            | 0           | 0           | 1             | 1           | 1           |
| WPS-2                              | 1            | 3           | 3           | 2             | 1           | 2           | 0            | 3           | 1           | 0             | 2           | 3           |
| WS1                                | 0            | 1           | 2           | 1             | 1           | 1           | 0            | 1           | 2           | 0             | 2           | 2           |
| WS2                                | 1            | 1           | 1           | 1             | 1           | 1           | 1            | 1           | 1           | 1             | 1           | 1           |
| WS3                                | 15           | 36          | 28          | 23            | 23          | 25          | 15           | 33          | 17          | 21            | 34          | 23          |
| ZB2                                | 0            | 0           | 0           | 0             | 0           | 0           | 0            | 0           | 0           | 0             | 0           | 0           |
| ZB3                                | 1            | 1           | 1           | 1             | 1           | 1           | 1            | 2           | 0           | 1             | 2           | 1           |
| <b>Total</b>                       | <b>2133</b>  | <b>6577</b> | <b>7339</b> | <b>2797</b>   | <b>3052</b> | <b>3932</b> | <b>1625</b>  | <b>7463</b> | <b>3638</b> | <b>2172</b>   | <b>5835</b> | <b>3859</b> |
